# Supplementary material
Source: PubMed Central journal article supplement (PMC1172237)
Supplement: pnas_0500353102_1.pdf [file pnas_0500353102_1.pdf]

**Table 1. Mean and SEM for each genotype, operative, and treatment group**

|                         | Wild-type |           |                       |           | Calstabin-2 <sup>-/-</sup> |           |                       |           |
|-------------------------|-----------|-----------|-----------------------|-----------|----------------------------|-----------|-----------------------|-----------|
|                         | Sham      |           | Myocardial infarction |           | Sham                       |           | Myocardial infarction |           |
|                         | Placebo   | JTV519    | Placebo               | JTV519    | Placebo                    | JTV519    | Placebo               | JTV519    |
| <b>Biometric values</b> |           |           |                       |           |                            |           |                       |           |
| Mice studied, <i>n</i>  | 10        | 8         | 16                    | 13        | 9                          | 10        | 11                    | 16        |
| Survival, %             | 100%      | 100%      | 81%                   | 85%       | 100%                       | 100%      | 64%                   | 44%       |
| Body weight, g          | 26.4±1.7  | 25.1±0.4  | 27.4±0.9              | 28.2±0.5  | 26.1±1.7                   | 25.0±0.6  | 23.7±1.0              | 26.3±1.4  |
| HW/BW, mg/g             | 5.2±0.3   | 5.3±0.2   | 9.0±0.6               | 7.7±0.4*  | 5.4±0.3                    | 5.3±0.2   | 9.2±0.8               | 9.0±0.6   |
| HW/TL, mg/mm            | 7.2±0.8   | 6.9±0.2   | 13.5±1.0              | 11.6±0.7* | 6.9±0.1                    | 6.9±0.3   | 12.3±0.9              | 12.2±1.0  |
| Infarct size            | 0         | 0         | 39.0±1.9              | 40.7±3.7  | 0                          | 0         | 41.8±4.7              | 46.4±5.1  |
| <b>Echocardiography</b> |           |           |                       |           |                            |           |                       |           |
| LVPW, μm                | 76±2.7    | 74±2.8    | 76.9±2.3              | 76±2.3    | 73±2.3                     | 71±2.3    | 76±3.1                | 73±2.9    |
| EDD, mm                 | 0.37±0.02 | 0.36±0.01 | 0.56±0.02             | 0.54±0.03 | 0.35±0.01                  | 0.36±0.02 | 0.51±0.03             | 0.50±0.02 |
| ESD, mm                 | 0.28±0.02 | 0.26±0.01 | 0.46±0.04             | 0.47±0.03 | 0.24±0.01                  | 0.24±0.01 | 0.44±0.03             | 0.45±0.02 |
| EF, %                   | 63.3±3.1  | 66.7±4.9  | 31.1±3.1              | 45.8±5.1* | 69.1±3.1                   | 68.6±2.8  | 31.5±5.7              | 31.9±3.1  |
| FS, %                   | 29.8±2.2  | 32.2±3.7  | 12.5±1.3              | 20.2±2.9* | 30.5±5.0                   | 33.3±2.0  | 12.9±2.8              | 12.8±1.5  |
| EDV, μl                 | 0.12±0.01 | 0.10±0.01 | 0.41±0.04             | 0.36±0.05 | 0.09±0.01                  | 0.11±0.01 | 0.32±0.08             | 0.32±0.03 |
| <b>Hemodynamic data</b> |           |           |                       |           |                            |           |                       |           |
| MAP, mmHg               | 75.9±6.4  | 70.2±3.4  | 67.1±2.7              | 68.5±3.4  | 76.3±5.1                   | 72.8±4.7  | 67.9±4.7              | 68.2±4.7  |
| HR, min <sup>-1</sup>   | 480±13    | 477±12    | 493±24                | 458±33    | 460±9                      | 465±14    | 471±28                | 457±21    |
| ESP, mmHg               | 94.8±2.7  | 93.9±1.5  | 84.0±3.1              | 92.7±5.4* | 101±3.4                    | 94.8±2.2  | 83.2±4.0              | 79.0±3.2  |
| dP/dt(max)              | 8005±284  | 8878±350  | 6215±309              | 6826±735  | 8515±473                   | 8030±322  | 5907±446              | 5726±314  |
| dP/dt(min)              | -6530±419 | -7371±266 | -5249±353             | -5810±649 | -7506±382                  | -7068±407 | -4878±301             | -4481±327 |

Data are presented as mean ± SEM. HW, heart weight; BW, body weight; TL, tibia length; LVPW, left ventricular posterior wall thickness; EDD, end-diastolic diameter; ESD, end-systolic diameter; EF, ejection fraction; FS, fractional shortening; EDV, end-diastolic volume; MAP, mean arterial blood pressure; HR, heart rate; ESP, end-systolic pressure.

\**P* < 0.05 placebo versus JTV519.
