# Supplementary material
Source: PubMed Central journal article supplement (PMC1172237)

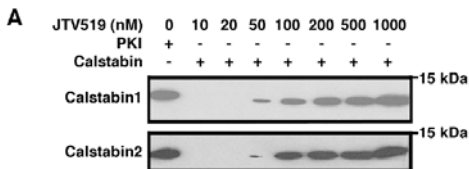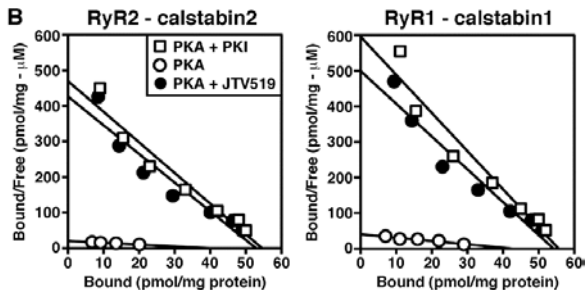

Supplement: pnas_0500353102_2.pdf [file pnas_0500353102_2.pdf]
